# Supplementary material for: Exploring hydrophobic diastereomeric 2,6-anhydro-glycoheptitols for their enzymatic polymerization with PEG: towards delivery applications
Source: Royal Society of Chemistry journal article supplement (doi:10.1039/d0nj02642e), 2020-01-01
Supplement: d0nj02642e1.pdf [file d0nj02642e1.pdf]

## SUPPORTING INFORMATION

### Exploring hydrophobic diastereomeric 2,6-anhydro-glycoheptitols for their enzymatic polymerization with PEG: Towards delivery applications

Vinod Khatri,<sup>a,b</sup> Sumati Bhatia,<sup>c</sup> Satyanarayan Deep,<sup>a,d</sup> Ekta Kohli,<sup>d</sup> Rainer Haag,<sup>e</sup> Nihar Nalini Senapati,<sup>e\*</sup> Ashok K. Prasad<sup>a\*</sup>

<sup>a</sup>Bioorganic Laboratory, Department of Chemistry, University of Delhi, Delhi 110 007, India;

<sup>b</sup>Department of Chemistry, Pt. Neki Ram Sharma Govt. College Rohtak-124001, India

<sup>c</sup>Institute for Chemistry and Biochemistry, Free University Berlin, Takustrasse 3, 14195 Berlin, Germany

<sup>d</sup>DRDO, DIPAS, Lucknow Road, Timarpur, Delhi 110 054, India;

<sup>e</sup>Department of Anaesthesia, RML Hospital, New Delhi- 110001, India

#### **\*Corresponding Author**

**Ashok K. Prasad**: Bioorganic Laboratory, Department of Chemistry, University of Delhi, Delhi 110007, India; E-mail: [ashokenzyme@gmail.com](mailto:ashokenzyme@gmail.com)

**Nihar Nalini Senapati**: <sup>e</sup>Department of Anaesthesia, RML Hospital, New Delhi – 110001, India; Email: [dr.nihar@yahoo.co.in](mailto:dr.nihar@yahoo.co.in)

#### Table of Contents

|                                                                                                                |              |
|----------------------------------------------------------------------------------------------------------------|--------------|
| <b><sup>1</sup>H and <sup>13</sup>C NMR spectra of copolymer 3</b>                                             | <b>S2</b>    |
| <b>DEPT-135 and (<sup>1</sup>H-<sup>13</sup>C) HETCOR NMR spectra of copolymer 3</b>                           | <b>S3</b>    |
| <b>(<sup>1</sup>H-<sup>1</sup>H) COSY NMR spectra of copolymer 3</b>                                           | <b>S4</b>    |
| <b><sup>1</sup>H and <sup>13</sup>C NMR spectra of copolymer 4</b>                                             | <b>S5</b>    |
| <b>(<sup>1</sup>H-<sup>13</sup>C) HETCOR and (<sup>1</sup>H-<sup>1</sup>H) COSY NMR spectra of copolymer 4</b> | <b>S6</b>    |
| <b>GPC data of copolymer 3 and 4</b>                                                                           | <b>S7</b>    |
| <b>Dynamic Light Scattering (DLS) data of copolymer 3 and 4</b>                                                | <b>S8-S9</b> |

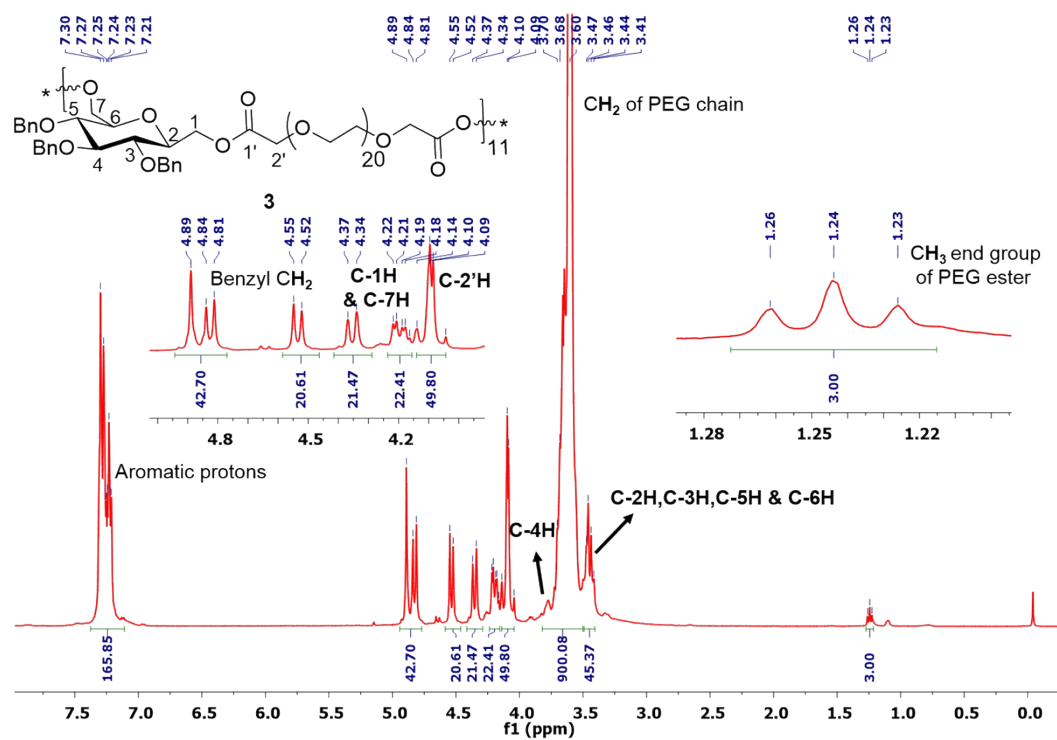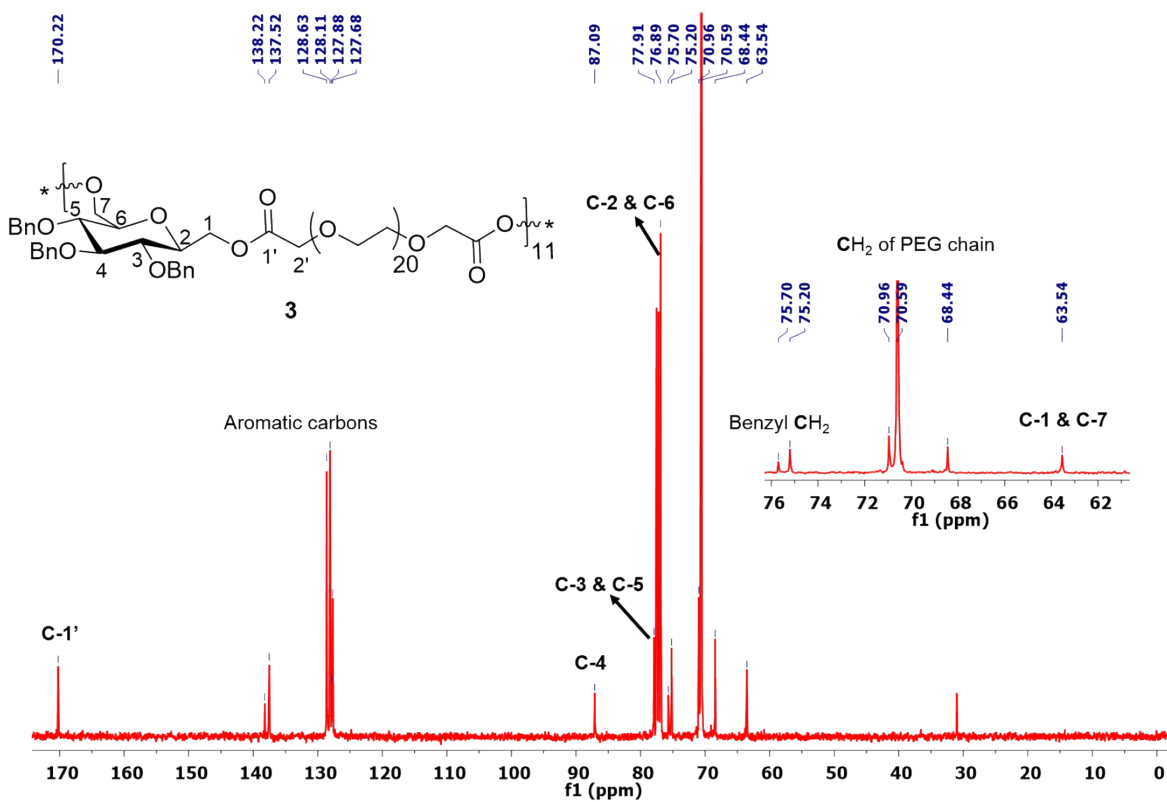

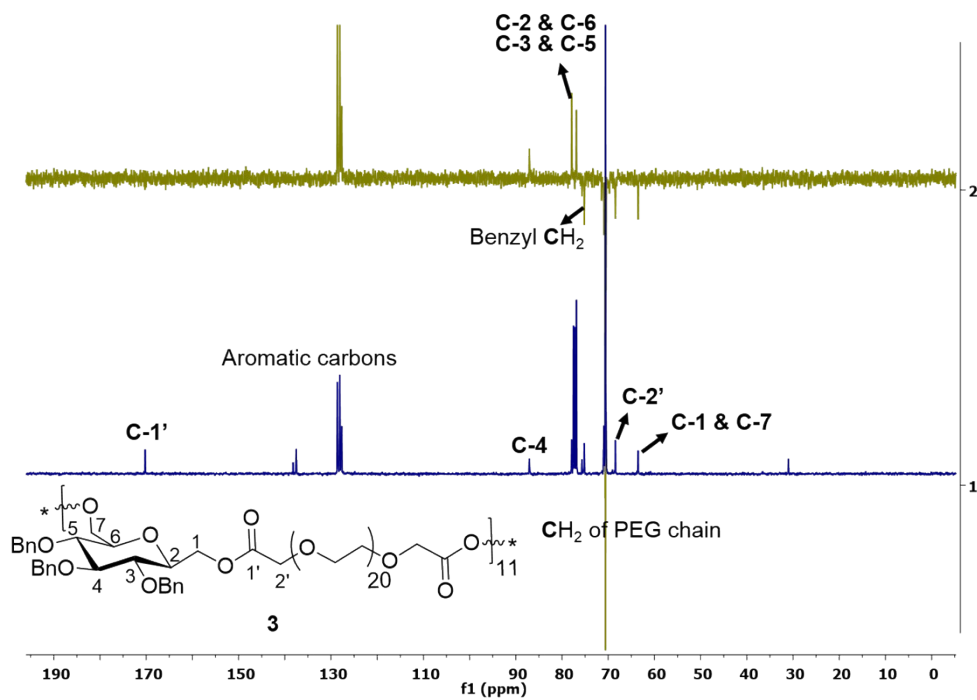

**Figure 3.** DEPT-135 NMR spectrum of copolymer **3** (100.6 MHz, CDCl<sub>3</sub>)

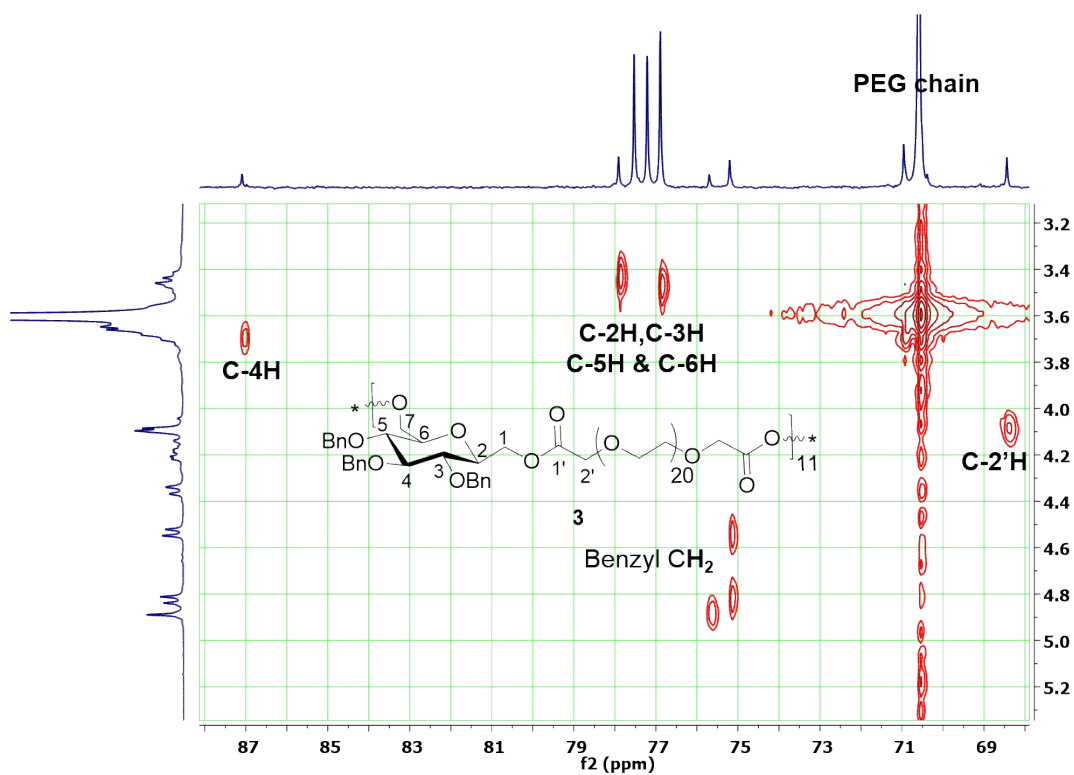

**Figure 4.** Partial <sup>1</sup>H-<sup>13</sup>C HETCOR spectrum of copolymer **3** (400 MHz, CDCl<sub>3</sub>)

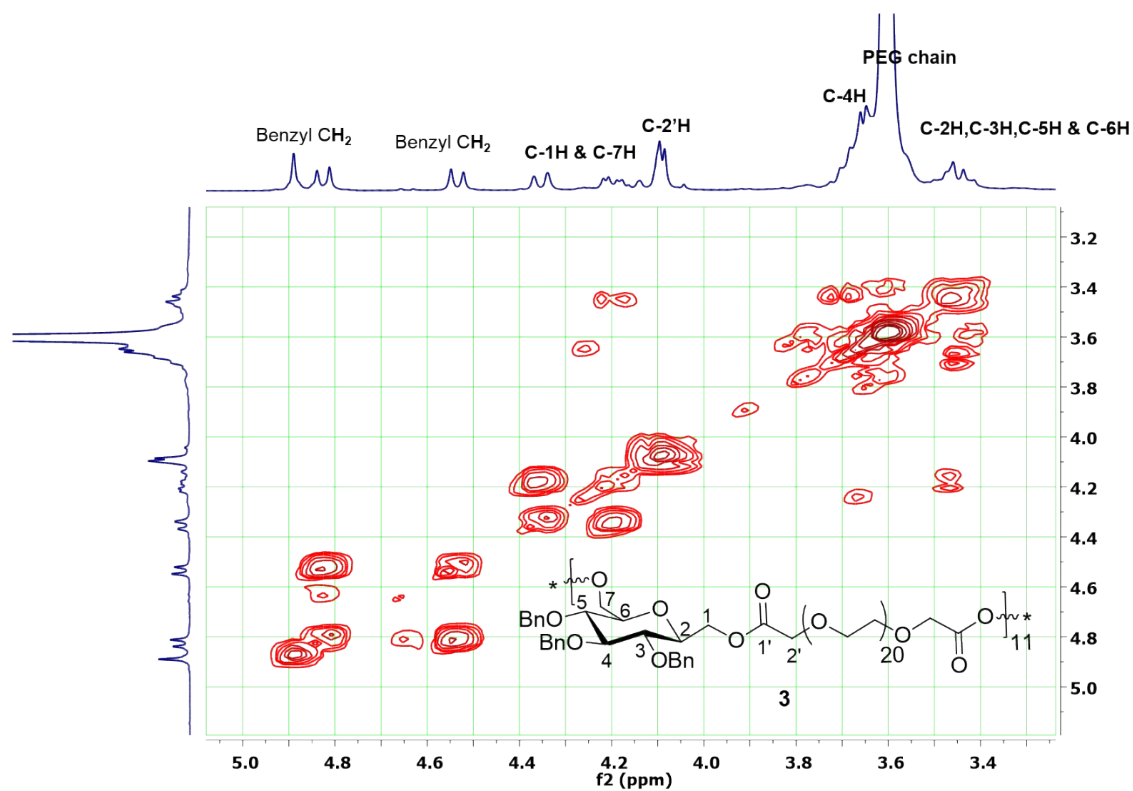

**Figure 5.** Partial  $^1\text{H}$ - $^1\text{H}$  COSY spectrum of copolymer **3** (400 MHz,  $\text{CDCl}_3$ )



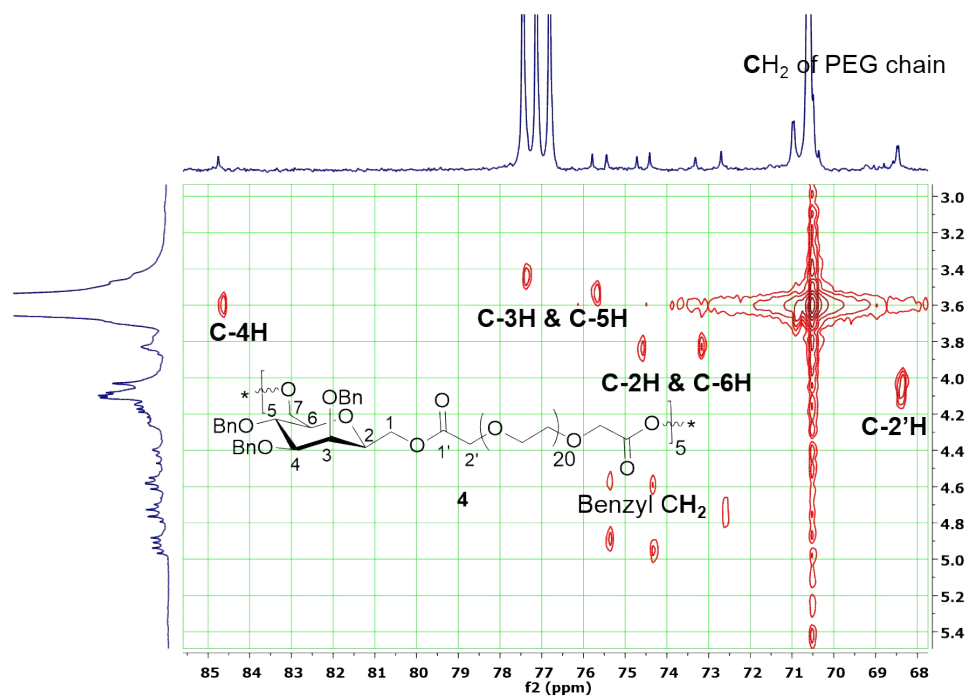

**Figure 8.** Partial  $^1\text{H}$ - $^{13}\text{C}$  HETCOR spectrum of copolymer **4** (400 MHz,  $\text{CDCl}_3$ )

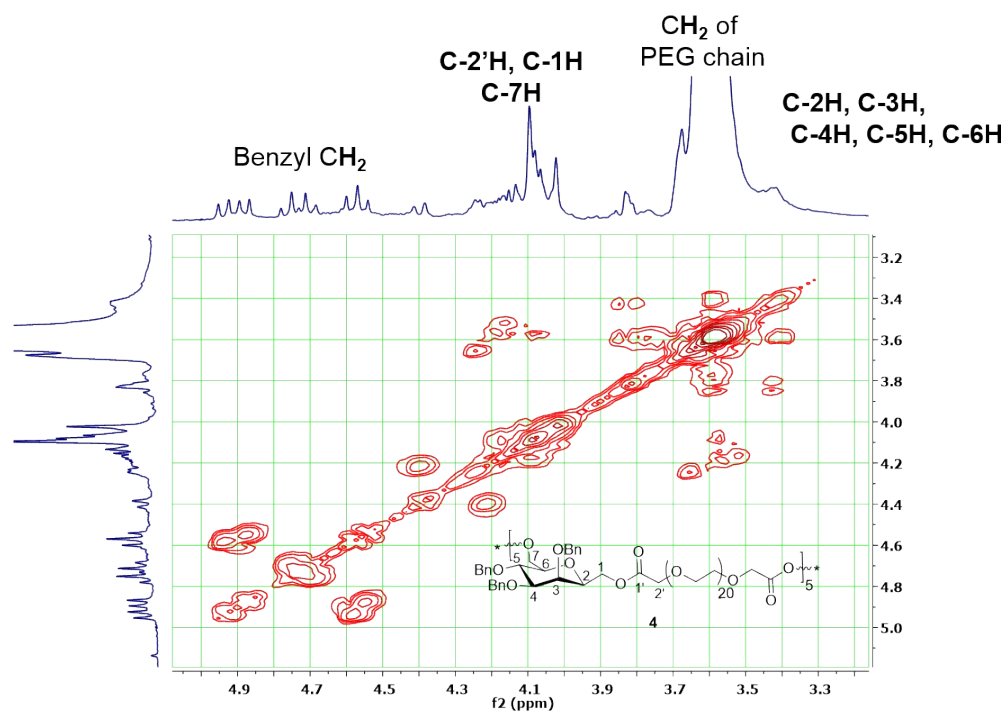

**Figure 9.** Partial  $^1\text{H}$ - $^1\text{H}$  COSY spectrum of copolymer **4** (400 MHz,  $\text{CDCl}_3$ )

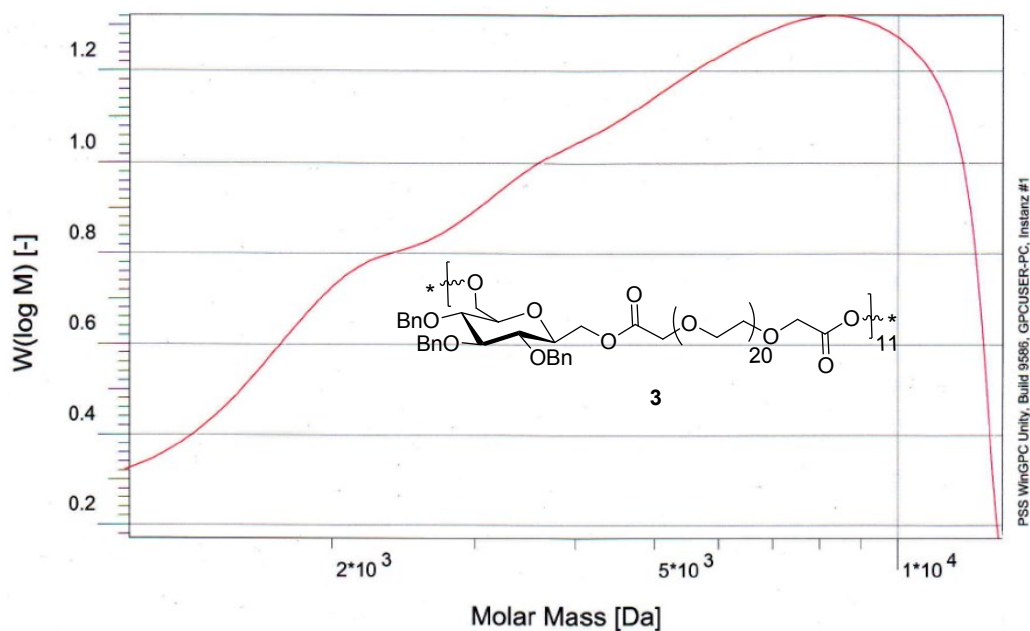

**Figure 10.** Gel permeation chromatogram (GPC) of copolymer **3**

$M_w = 5678$  g/mol,  $M_n = 3824$  g/mol,  $M_z = 7494$  g/mol,  $D = 1.4$

Detector: RI, Eluent = THF, Flow rate = 1 mL/min, Standard = Polystyrol.

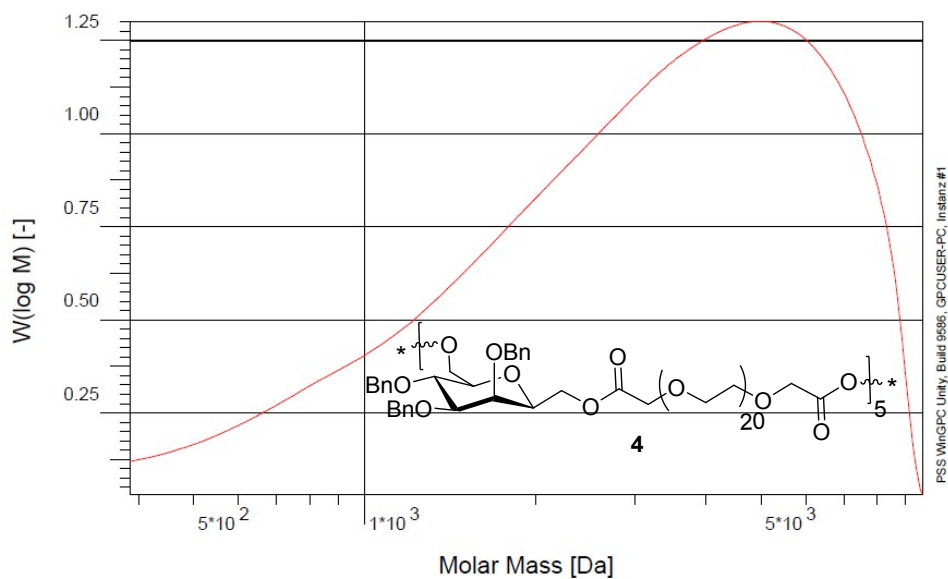

**Figure 11.** Gel permeation chromatogram (GPC) of copolymer **4**

$M_w = 3670$  g/mol,  $M_n = 2180$  g/mol,  $M_z = 4984$  g/mol,  $D = 1.6$

Detector: RI, Eluent = THF, Flow rate = 1 mL/min, Standard = Polystyrol.

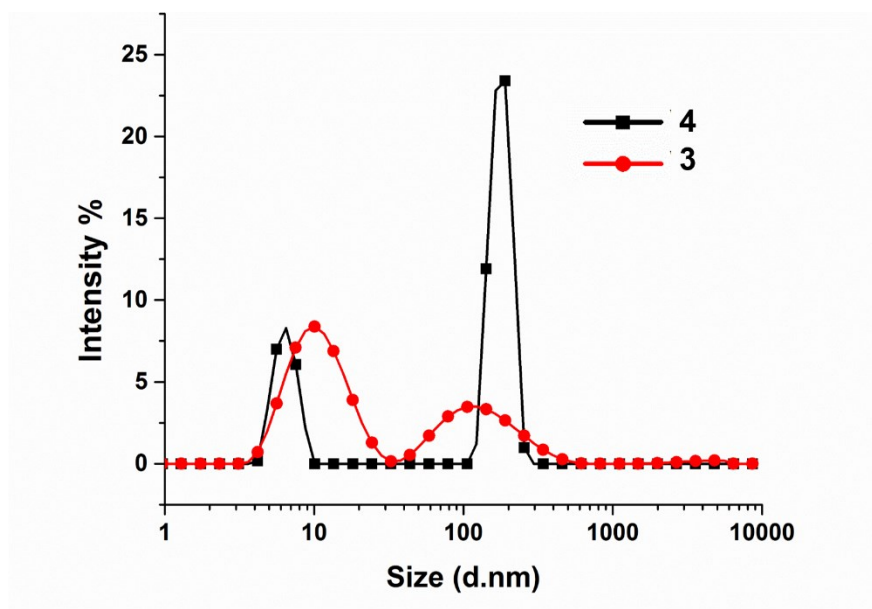

**Figure 12.** Intensity based particle size determination of copolymer **3** and **4** by dynamic light scattering (DLS) method

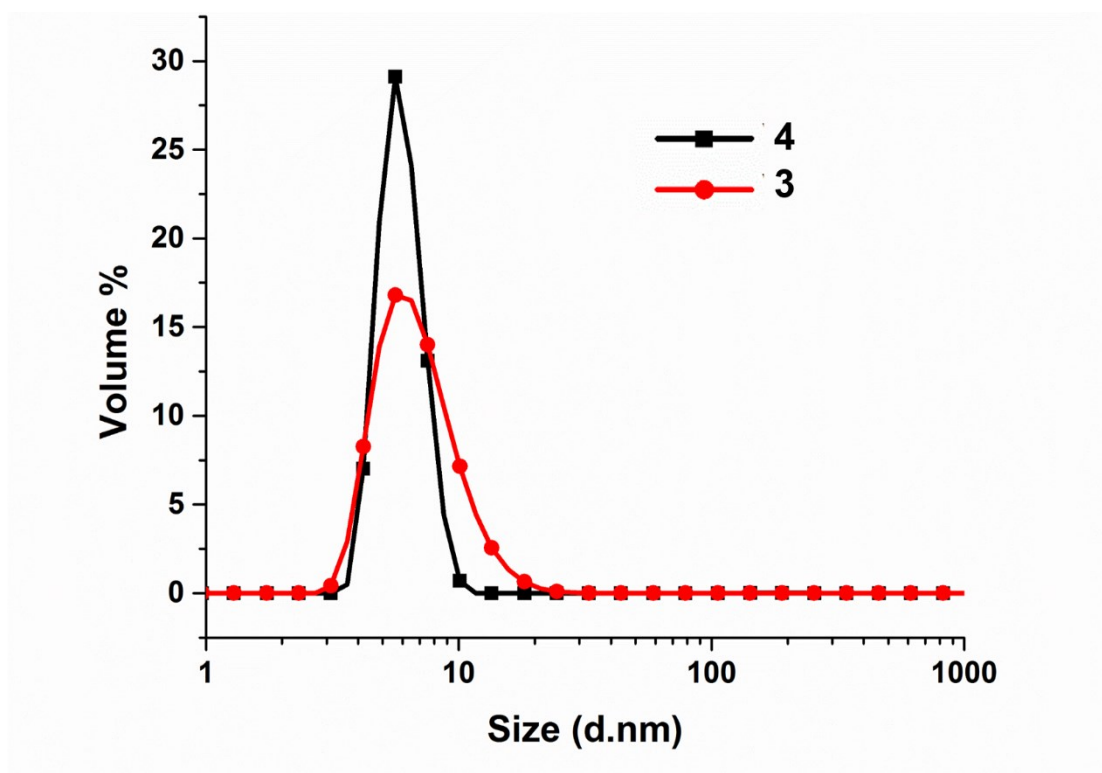

**Figure 13.** Volume based particle size determination of copolymer **3** and **4** by dynamic light scattering (DLS) method

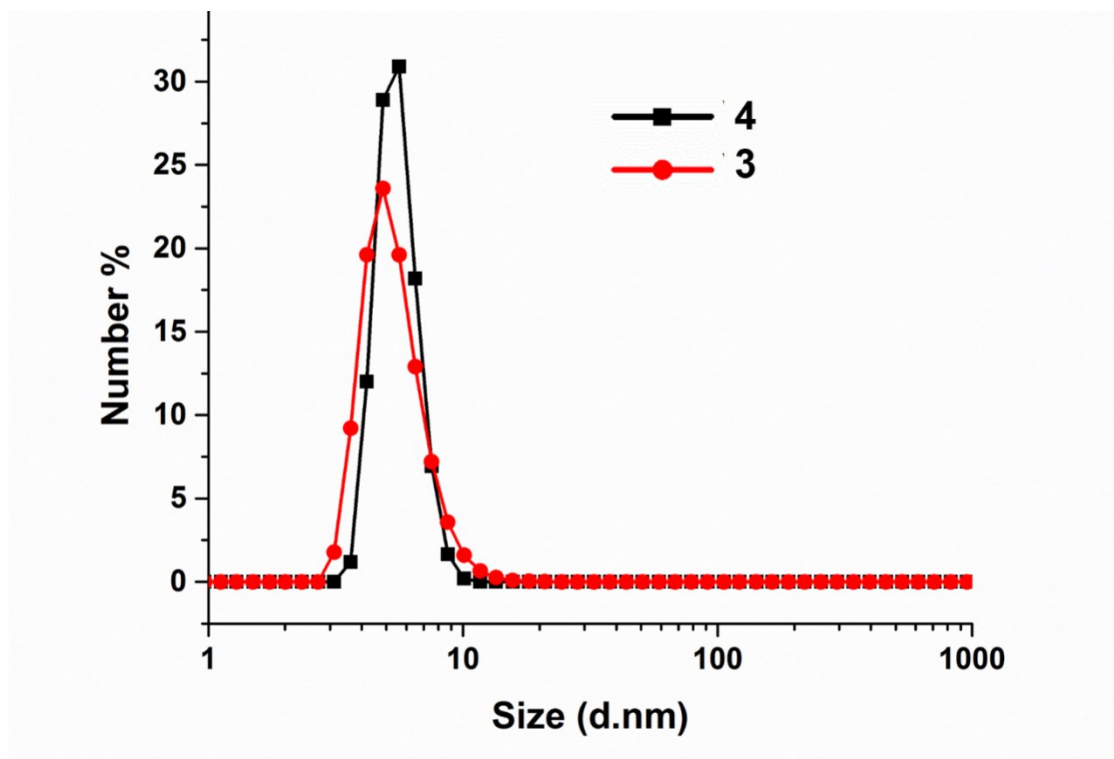

**Figure 14.** Number based particle size determination of copolymer **3** and **4** by dynamic light scattering (DLS) method
